# Supplementary material for: Increasing metformin concentrations and its excretion in both rat and porcine ex vivo normothermic kidney perfusion model
Source: PubMed Central journal article supplement (PMC7437879; doi:10.1136/bmjdrc-2019-000816), 2020-08-17
Supplement: bmjdrc-2019-000816supp001.pdf [file bmjdrc-2019-000816supp001.pdf]

**Supplemental material****Increasing metformin concentrations and its excretion in both a rat and porcine ex-vivo normothermic kidney perfusion model**

Rene A. Posma, Leonie H. Venema, Tobias M. Huijink, Andrie C. Westerkamp, A. Mireille A. Wessels, Nynke J. de Vries, Frank Doesburg, Jan Roggeveld, Petra J. Ottens, Daan J. Touw, Maarten W.N. Nijsten, and Henri G.D. Leuvenink

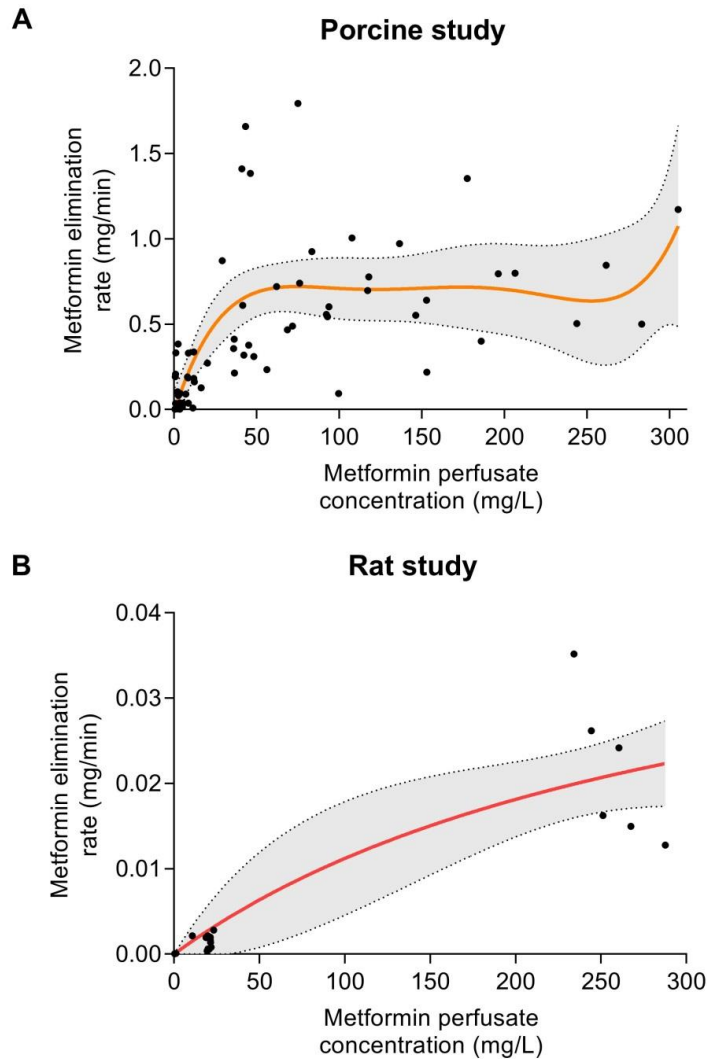

**Supplementary Figure 1** – Fit with 95% confidence interval of the relation of metformin perfusate concentration with the urinary elimination rate obtained from (A) a centered fifth-order polynomial model in the porcine study and (B) a Michaelis-Menten model in the rat study.

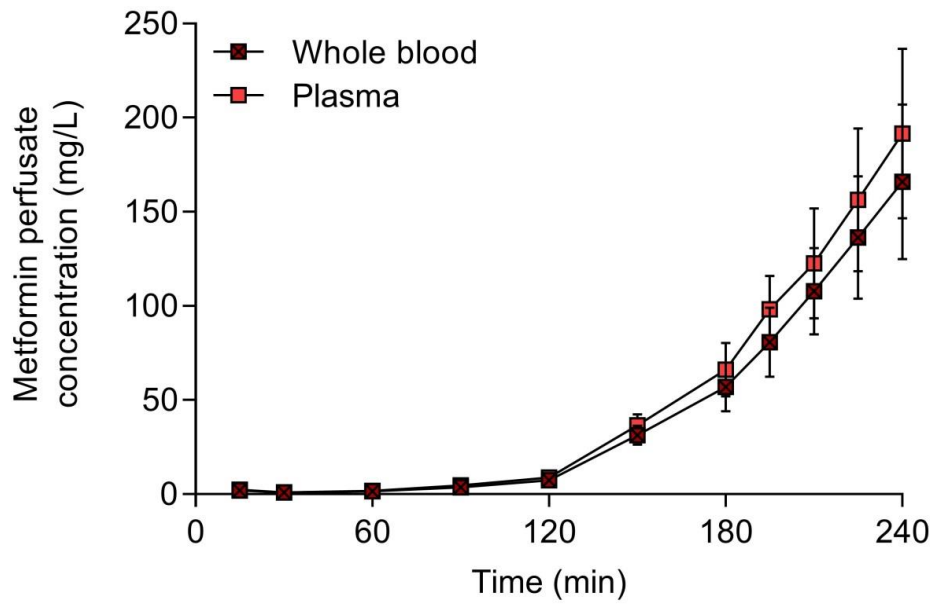

**Supplemental Figure 2** – Metformin concentration in whole blood and plasma during normothermic machine perfusion of metformin-treated porcine kidneys.

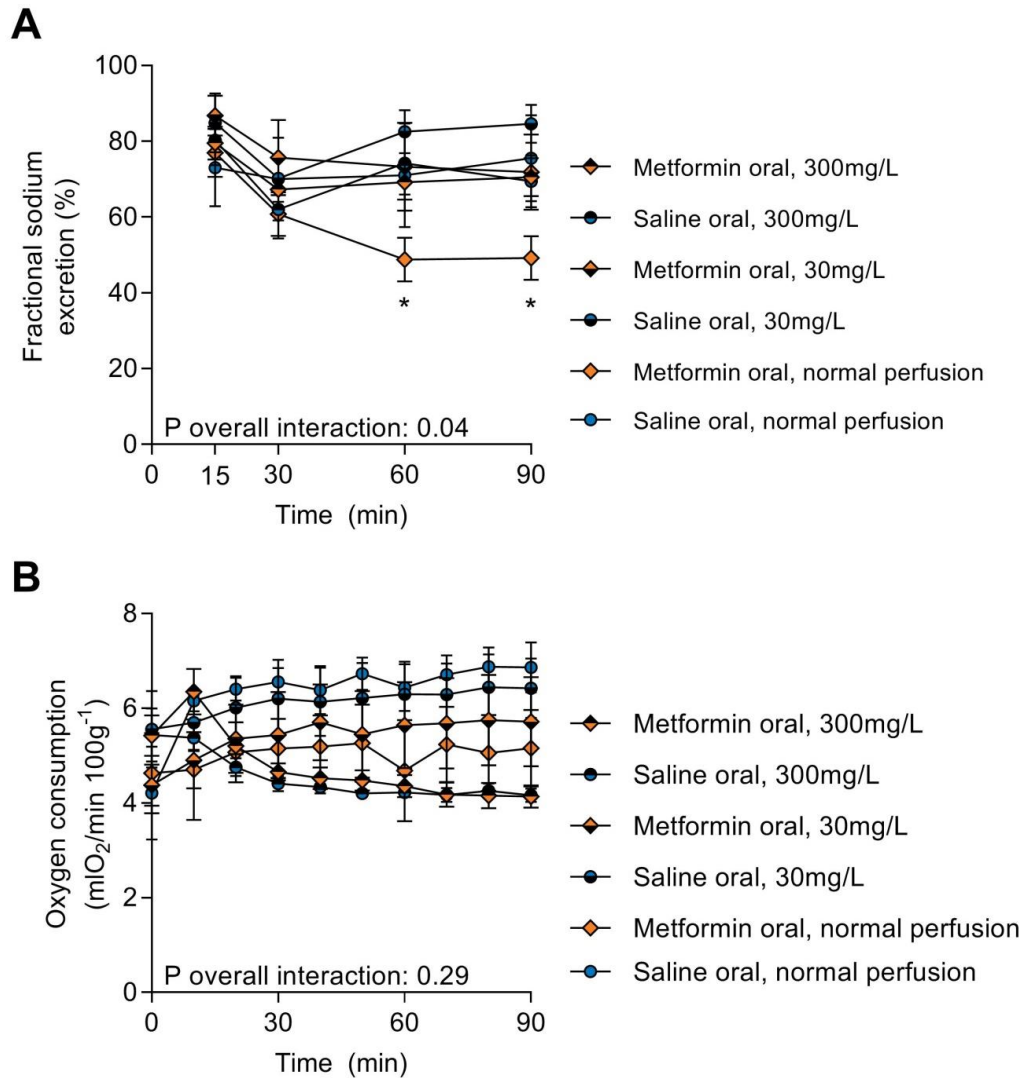

**Supplemental Figure 3** – (A) Trajectories of fractional sodium excretion, an indicator for tubular function, during normothermic machine perfusion of rat kidneys. Lower fractional sodium excretion corresponds with improved tubular function. Rats were pretreated with 300 mg/kg metformin or saline twice the day before nephrectomy. \*  $P < 0.05$  vs. all other treatment groups. (B) Trajectories of oxygen consumption, indexed for kidney weight, during normothermic machine perfusion of rat kidneys. Data are expressed as mean  $\pm$  SEM.

P-values are derived from a linear mixed-effects repeated measures model with random slope and intercept on an individual level. Fixed effects were time, treatment group, and the interaction of treatment group with time. Individual kidneys were considered as a random effect. An unstructured covariance was assumed and a restricted maximum likelihood approach was used.

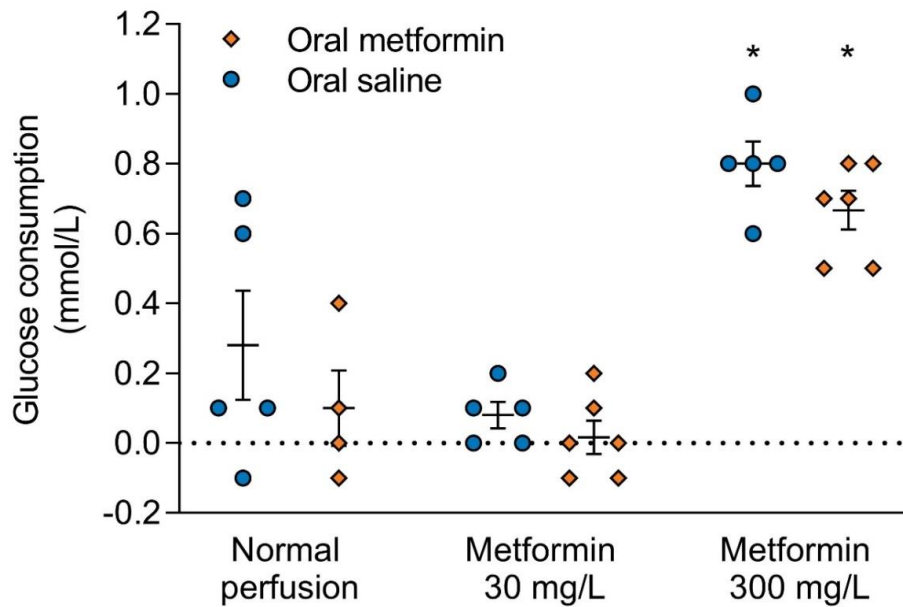

**Supplemental Figure 4** – Glucose consumption of rat kidneys during 90 minutes of normothermic machine perfusion (NMP). Glucose consumption was calculated by subtracting the glucose concentration at the end of NMP from the glucose concentration at start of NMP. All glucose measurements were performed on a ABL90 FLEX blood gas analyser (Radiometer, Bronshoj, Denmark). \* $P \leq 0.03$  versus all other experimental groups. Data are presented as mean  $\pm$  SEM.

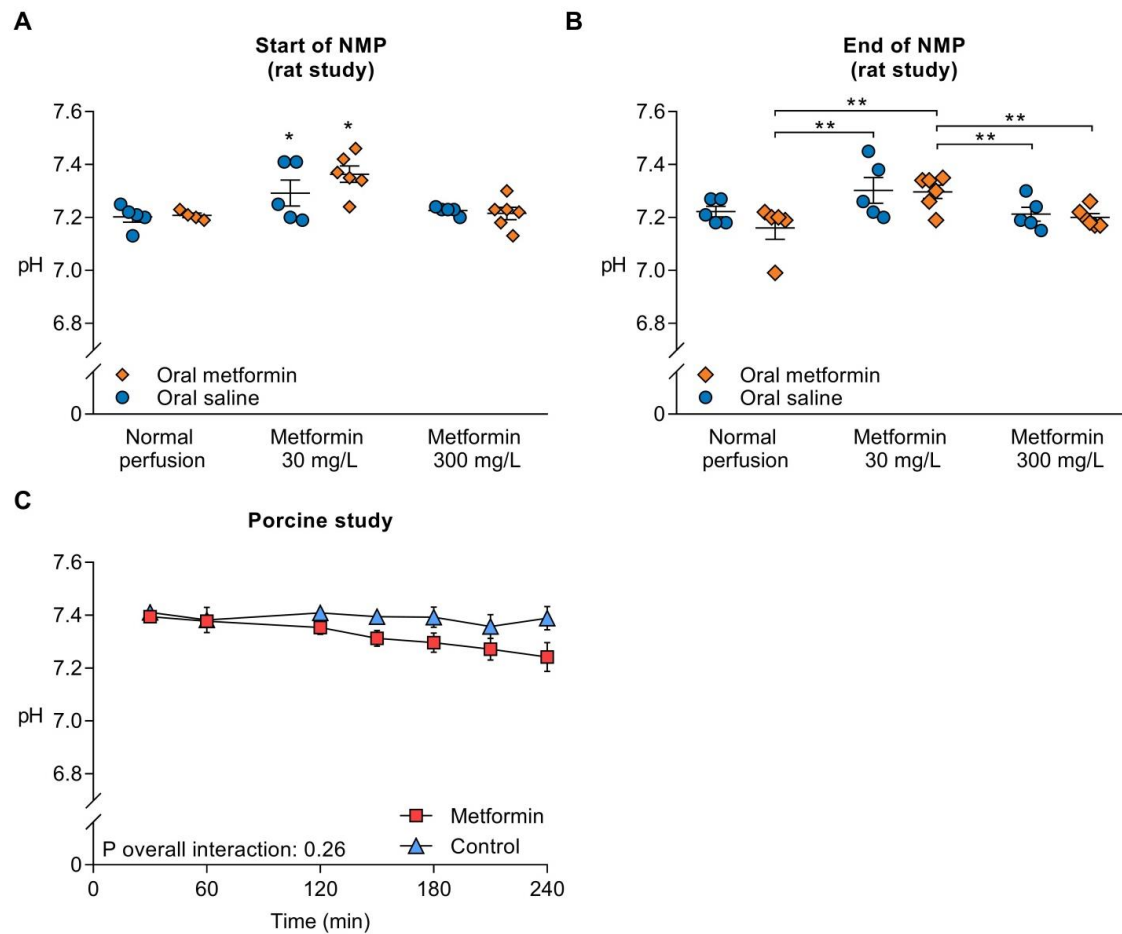

**Supplemental Figure 5** – Perfusion fluid pH at the start of normothermic machine perfusion (NMP) of rat kidneys (A), and at the end of NMP of rat kidneys (B). Trajectory of pH over time during NMP of porcine kidneys (C). \*  $p < 0.05$  vs. all other treatment groups. \*\*  $p < 0.01$

P-value for interaction provided for the porcine study (C) was derived from a linear mixed-effects repeated measures model with random slope and intercept. Fixed effects were time, treatment group, and the interaction of treatment group and time. Individual kidneys were considered as a random effect. The covariance matrix of residuals used in all models was unstructured. A restricted maximum likelihood approach was used.

**Supplemental Table 1 - Compounds of the perfusion fluid used in the porcine study.**

| <b>Material</b>                                                                            | <b>Amount</b>    | <b>Manufacturer</b>                            |
|--------------------------------------------------------------------------------------------|------------------|------------------------------------------------|
| Autologous leukocyte filtered blood                                                        | 500 ml           | Not applicable                                 |
| Ringer's lactate solution                                                                  | 300 ml           | Baxter, Utrecht, The Netherlands               |
| Glucose 5% solution                                                                        | 10 ml            | Baxter, Utrecht, The Netherlands               |
| Amoxicillin-clavulanate                                                                    | 1000mg/200mg     | Sandoz, Almere, The Netherlands                |
| Dexamethasone                                                                              | 6 mg             | B. Braun, Melsungen, Germany                   |
| Sodium bicarbonate 8.4%                                                                    | 10 ml            | B. Braun, Melsungen, Germany                   |
| Creatinine                                                                                 | 90 mg            | Sigma-Aldrich, St. Louis, MO                   |
| Mannitol                                                                                   | 6 mg             | Sigma-Aldrich, St. Louis, MO                   |
| Sodiumnitroprusside                                                                        | 2 mg             | Sigma-Aldrich, St. Louis, MO                   |
| 1,1-dimethylbiguanide hydrochloride                                                        | 3,3 mg           | Sigma-Aldrich, St. Louis, MO                   |
| <b>Continuous infusion 1*</b>                                                              |                  |                                                |
| Glucose 5%                                                                                 | 5 ml/h           | Baxter, Utrecht, The Netherlands               |
| <b>Continuous infusion 2                      20 ml/h</b>                                  |                  |                                                |
| Aminoplasmal 10%                                                                           | 82 ml            | B. Braun, Melsungen, Germany                   |
| Insulin aspart (Novorapid)                                                                 | 1 ml (100 IU/ml) | Novo Nordisk, Alphen a/d Rijn, The Netherlands |
| Sodiumbicarbonate 8.4%                                                                     | 2,5 ml           | B. Braun, Melsungen, Germany                   |
| <b>Continuous infusion 3                      Speed according to prespecified schedule</b> |                  |                                                |
| 1,1-dimethylbiguanide hydrochloride                                                        | 0.7 gram         | Sigma-Aldrich, St. Louis, MO                   |
| Ringer's lactate solution                                                                  | 35 ml            | Baxter, Utrecht, The Netherlands               |

\* Speed adjusted to maintain a glucose level between 7.0 mmol/L and 8.0 mmol/L

**Supplemental Table 2 – Prespecified metformin infusion speed schedule.**

| <b>Time (mins)</b> | <b>mg/h</b>   | <b>Cumulative amount of metformin administered (mg)</b> |
|--------------------|---------------|---------------------------------------------------------|
| 0                  | 15            | 0                                                       |
| 30                 | 20            | 7.5                                                     |
| 60                 | 40            | 17.5                                                    |
| 90                 | 70            | 37.5                                                    |
| 120                | 170           | 72.5                                                    |
| 150                | 210           | 157.5                                                   |
| 180                | 260           | 262.5                                                   |
| 210                | 310           | 392.5                                                   |
| 240                | Stop infusion | 547.5                                                   |



**Supplemental Table 3 – Primers used for real-time PCR.**

| <b>Gene</b>          | <b>Primers</b>            |                            | <b>Amplicon size (bp)</b> |
|----------------------|---------------------------|----------------------------|---------------------------|
| <i>Rat study</i>     |                           |                            |                           |
| $\beta$ -actin       | GGAAATCGTGCGTGACATTA AAA  | GCGGCAGTGGCCATCTC          | 74                        |
| OCT-1                | AGGCAAGTCCTCAAGTACCTGACAG | CCAAGTGGCAAGTCCTCCTTT      | 77                        |
| OCT-2                | CCATTGCATGCTTGGGTAGAA     | ACAAGGACACCAAGATTCCTGATGTA | 105                       |
| OCT-3                | TAACGTGTGGGCTCGAGTAGGA    | ACATTAGGGATGAAGGGCTGC      | 80                        |
| MATE-1               | TGGTGGGTGGGATTTTAGTGAG    | AGCACCTGCATTGCTGGATTA      | 76                        |
| <i>Porcine study</i> |                           |                            |                           |
| $\beta$ -actin       | TCTGCGCAAGTTAGGTTTTGTC    | CGTCCACCGCAAATGCTT         | 92                        |
| OCT-1                | GCGAGGTCGACGGAGTTATTATCT  | TGGGAGCAGGCAAGAAGGA        | 82                        |
| OCT-2                | TCGCAAAGCACATGCAATTC      | GGCAGACACACTGGTATACAGAACA  | 93                        |
| MATE-2K              | AGCATCCTGAGGAATAAACTGGG   | GATATAAAGCGGCAGGGCCTT      | 86                        |
